# Supplementary material
Source: PubMed Central journal article supplement (PMC4369189)
Supplement: NIHMS666386-supplement-401_2015_1398_MOESM2_ESM.pdf [file NIHMS666386-supplement-401_2015_1398_MOESM2_ESM.pdf]

Online resource 2 –IDH mutation and 1p/19q deletion status among histological subtypes.

## **Title**

### **IDH mutation status and role of WHO grade and mitotic index in overall survival in grade II-III diffuse gliomas**

Acta Neuropathologica

**Authors:** Adriana Olar, Khalida M. Wani, Kristin Diefes, Lindsey E. Heathcock, Hinke F. van Thuijl, Mark R. Gilbert, Terri S. Armstrong, Erik P. Sulman, Daniel P. Cahill, Elizabeth Vera-Bolanos, Ying Yuan, Jaap C. Reijneveld, Bauke Ylstra, Pieter Wesseling, Kenneth D. Aldape

#### **Corresponding authors:**

Adriana Olar, MD

The University of Texas MD Anderson Cancer Center

Dept. of Pathology, G1.3510

1515 Holcombe Blvd.

Houston, TX, 77030, USA

Email: [adriana\\_olar@yahoo.com](mailto:adriana_olar@yahoo.com)

Kenneth Aldape, MD

Princess Margaret Cancer Centre and Ontario Cancer Institute

610 University Ave

Toronto, ON M5G 2M9, Canada

Email: [ken.aldape@uhnresearch.ca](mailto:ken.aldape@uhnresearch.ca)

**Table S2:** The distribution of diffuse gliomas stratified by IDH mutation and 1p/19q deletion status among histological subtypes. Legend: IDHm – IDH-mutant, IDHwt – IDH-wild type.

| <b>Morphology</b>       | <b>1p/19q status</b> | <b>IDHm</b> | <b>IDHwt</b> | <b>Total</b> |
|-------------------------|----------------------|-------------|--------------|--------------|
| <b>Astrocytic</b>       | co-deleted           | 19          | 0            | 19           |
|                         | non-co-deleted       | 173         | 43           | 216          |
| <b>Oligodendroglial</b> | co-deleted           | 188         | 0            | 188          |
|                         | non-co-deleted       | 86          | 38           | 124          |
| <b>Mixed</b>            | co-deleted           | 4           | 0            | 4            |
|                         | non-co-deleted       | 5           | 2            | 7            |
| <b>Total</b>            |                      | 475         | 83           | 558          |
