# Supplementary material
Source: PubMed Central journal article supplement (PMC4369189)
Supplement: NIHMS666386-supplement-401_2015_1398_MOESM4_ESM.pdf [file NIHMS666386-supplement-401_2015_1398_MOESM4_ESM.pdf]

Online resource 4 – Multivariate analyses with adjuvant treatment and WHO grade.

**Title**

**IDH mutation status and role of WHO grade and mitotic index in overall survival in grade II-III diffuse gliomas**

Acta Neuropathologica

**Authors:** Adriana Olar, Khalida M. Wani, Kristin Diefes, Lindsey E. Heathcock, Hinke F. van Thuijl, Mark R. Gilbert, Terri S. Armstrong, Erik P. Sulman, Daniel P. Cahill, Elizabeth Vera-Bolanos, Ying Yuan, Jaap C. Reijneveld, Bauke Ylstra, Pieter Wesseling, Kenneth D. Aldape

**Corresponding authors:**

Adriana Olar, MD

The University of Texas MD Anderson Cancer Center

Dept. of Pathology, G1.3510

1515 Holcombe Blvd.

Houston, TX, 77030, USA

Email: [adriana\\_olar@yahoo.com](mailto:adriana_olar@yahoo.com)

Kenneth Aldape, MD

Princess Margaret Cancer Centre and Ontario Cancer Institute

610 University Ave

Toronto, ON M5G 2M9, Canada

Email: [ken.aldape@uhnresearch.ca](mailto:ken.aldape@uhnresearch.ca)

**Table S4.1:** Cox multivariate analysis among all 439 diffuse glioma cases on which adjuvant treatment data were available; with mitotic index (A) and with WHO grade (B).

**A**

| Variable                                  | p-value | Hazard Ratio | 95% CI    |
|-------------------------------------------|---------|--------------|-----------|
| <b>IDH status (mut vs wt)</b>             | <0.0001 | 0.36         | 0.25-0.52 |
| <b>1p/19q status (codel vs non-codel)</b> | <0.0009 | 0.57         | 0.40-0.79 |
| <b>Mitotic index (high vs low)</b>        | <0.0001 | 2.00         | 1.49-2.68 |
| <b>Age</b>                                | <0.0001 | 1.03         | 1.02-1.04 |
| <b>Adjuvant chemotherapy (yes vs. no)</b> | 0.1900  | 0.82         | 0.61-1.10 |
| <b>Adjuvant radiation (yes vs. no)</b>    | 0.0020  | 0.58         | 0.41-0.82 |

**B**

| Variable                                   | p-value | Hazard Ratio | 95% CI    |
|--------------------------------------------|---------|--------------|-----------|
| <b>IDH status (mut vs. wt)</b>             | <0.0001 | 0.34         | 0.24-0.49 |
| <b>1p/19q status (codel vs. non-codel)</b> | <0.0060 | 0.63         | 0.45-0.88 |
| <b>WHO grade (III vs. II)</b>              | 0.1388  | 1.28         | 0.92-1.77 |
| <b>Age</b>                                 | <0.0001 | 1.03         | 1.02-1.04 |
| <b>Adjuvant chemotherapy (yes vs. no)</b>  | 0.0956  | 0.78         | 0.58-1.05 |
| <b>Adjuvant radiation (yes vs. no)</b>     | 0.0179  | 0.65         | 0.45-0.93 |

CI: confidence interval, codel – co-deleted, mut – mutant, wt – wild-type.

**Table S4.2:** Cox multivariate analysis on 373 IDH-mutant cases on which adjuvant treatment data were available; with mitotic index (A) and with WHO grade (B).

**A**

| Variable                                   | p-value | Hazard Ratio | 95% CI    |
|--------------------------------------------|---------|--------------|-----------|
| <b>1p/19q status (codel vs. non-codel)</b> | 0.0052  | 0.62         | 0.44-0.87 |
| <b>Mitotic index (high vs. low)</b>        | 0.0566  | 1.41         | 0.99-2.02 |
| <b>Age</b>                                 | 0.3229  | 1.01         | 0.99-1.02 |
| <b>Adjuvant chemotherapy (yes vs. no)</b>  | 0.2433  | 0.82         | 0.59-1.14 |
| <b>Adjuvant radiation (yes vs. no)</b>     | 0.0028  | 0.55         | 0.37-0.81 |

**B**

| Variable                                   | p-value | Hazard Ratio | 95% CI    |
|--------------------------------------------|---------|--------------|-----------|
| <b>1p/19q status (codel vs. non-codel)</b> | 0.0098  | 0.64         | 0.46-0.90 |
| <b>WHO grade (III vs. II)</b>              | 0.4804  | 1.14         | 0.79-1.64 |
| <b>Age</b>                                 | 0.3696  | 1.01         | 0.99-1.02 |
| <b>Adjuvant chemotherapy (yes vs. no)</b>  | 0.1424  | 0.78         | 0.56-1.09 |
| <b>Adjuvant radiation (yes vs. no)</b>     | 0.0140  | 0.59         | 0.39-0.90 |

CI: confidence interval, codel – co-deleted, mut – mutant, wt – wild-type.

**Table S4.3:** Cox multivariate analysis on 66 IDH-wild type cases on which adjuvant treatment data were available; with mitotic index (A) and with WHO grade (B).

**A**

| Variable                           | p-value | Hazard Ratio | 95% CI    |
|------------------------------------|---------|--------------|-----------|
| Mitotic index (high vs. low)       | 0.0015  | 3.10         | 1.54-6.24 |
| Age                                | <0.0001 | 1.04         | 1.02-1.06 |
| Adjuvant chemotherapy (yes vs. no) | 0.8990  | 0.95         | 0.44-2.06 |
| Adjuvant radiation (yes vs. no)    | 0.8367  | 0.92         | 0.41-2.05 |

**B**

| Variable                           | p-value | Hazard Ratio | 95% CI      |
|------------------------------------|---------|--------------|-------------|
| WHO grade (III vs. II)             | 0.0363  | 2.25         | 1.05-4.79   |
| Age                                | <0.0001 | 1.06         | 1.04-1.08   |
| Adjuvant chemotherapy (yes vs. no) | 0.8539  | 0.93)        | (0.44-1.99) |
| Adjuvant radiation (yes vs. no)    | 0.6839  | 0.85         | 0.38-1.89   |

CI: confidence interval.
