# Supplementary material
Source: PubMed Central journal article supplement (PMC4369189)
Supplement: NIHMS666386-supplement-401_2015_1398_MOESM5_ESM.pdf [file NIHMS666386-supplement-401_2015_1398_MOESM5_ESM.pdf]

Online resource 5 – Analyses within the IDH mutant/1p/19q non-co-deleted subgroup (n=264)

## **Title**

### **IDH mutation status and role of WHO grade and mitotic index in overall survival in grade II-III diffuse gliomas**

Acta Neuropathologica

**Authors:** Adriana Olar, Khalida M. Wani, Kristin Diefes, Lindsey E. Heathcock, Hinke F. van Thuijl, Mark R. Gilbert, Terri S. Armstrong, Erik P. Sulman, Daniel P. Cahill, Elizabeth Vera-Bolanos, Ying Yuan, Jaap C. Reijneveld, Bauke Ylstra, Pieter Wesseling, Kenneth D. Aldape

#### **Corresponding authors:**

Adriana Olar, MD

The University of Texas MD Anderson Cancer Center

Dept. of Pathology, G1.3510

1515 Holcombe Blvd.

Houston, TX, 77030, USA

Email: [adriana\\_olar@yahoo.com](mailto:adriana_olar@yahoo.com)

Kenneth Aldape, MD

Princess Margaret Cancer Centre and Ontario Cancer Institute

610 University Ave

Toronto, ON M5G 2M9, Canada

Email: [ken.aldape@uhnresearch.ca](mailto:ken.aldape@uhnresearch.ca)

**Figure S5:** Overall survival among IDH mutated and 1p/19q non-co-deleted diffuse gliomas (n=264) stratified by WHO grade (A), mitotic index subgroups (B), and by age subgroups (C). Note: all reported p values are log-rank.

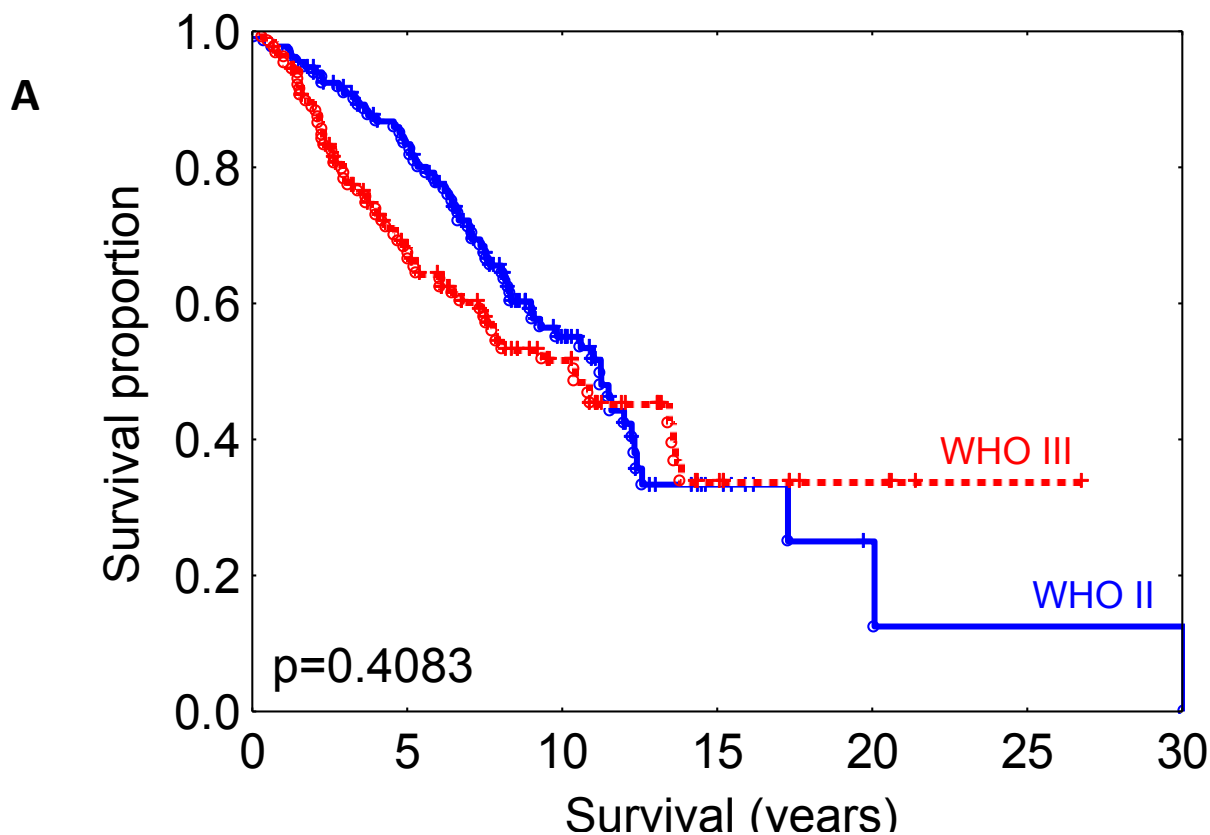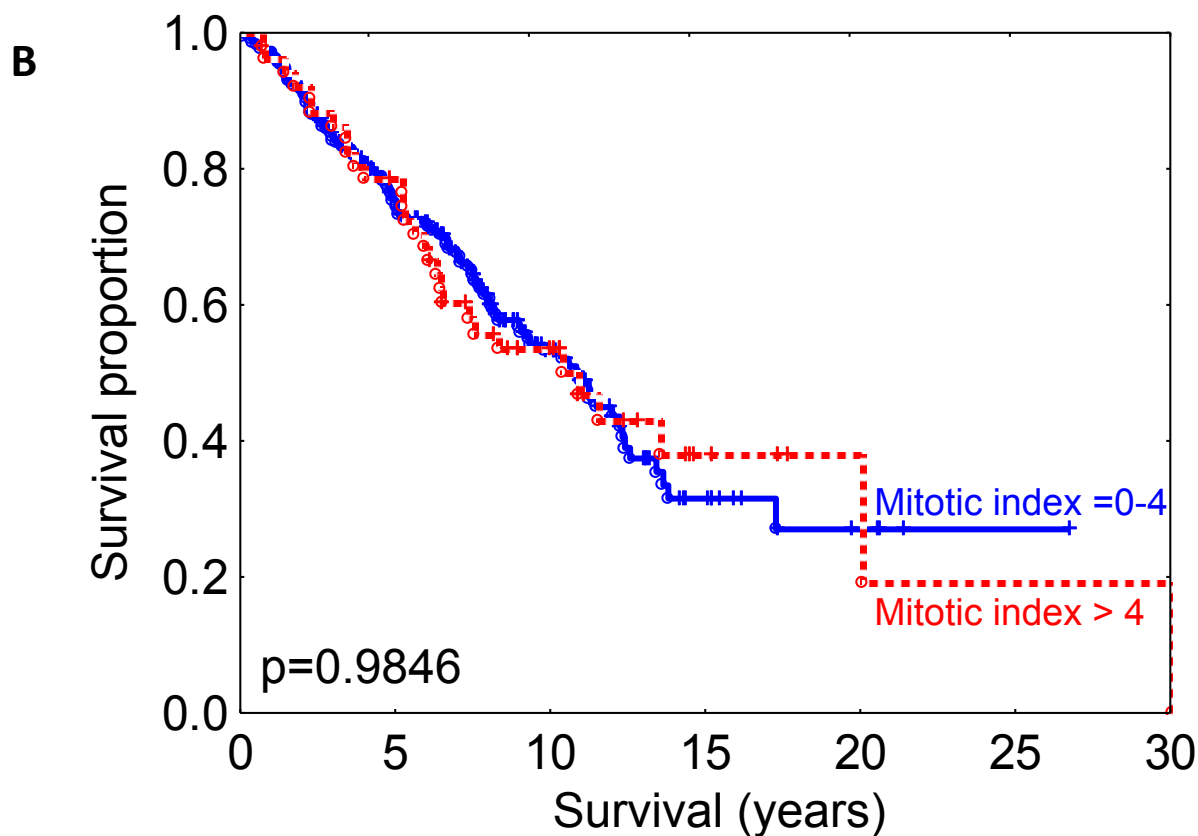

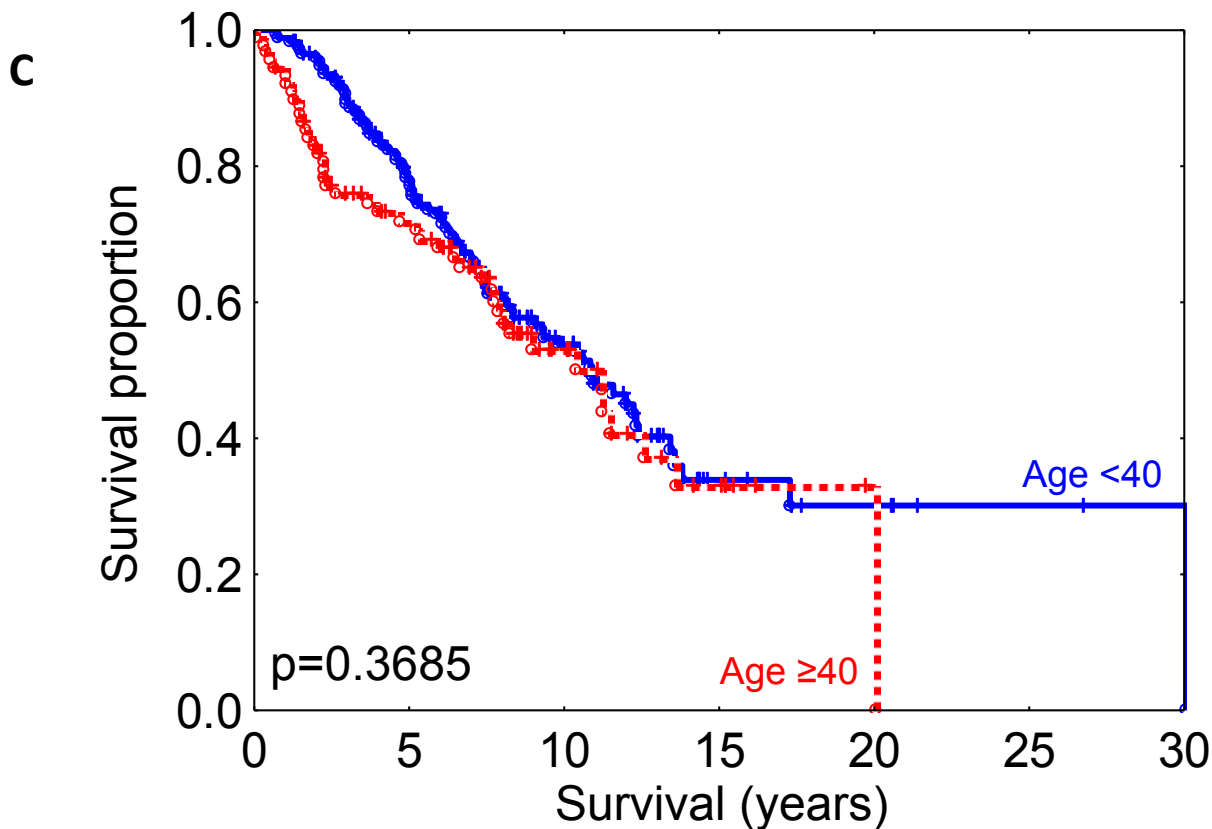

**Table S5:** Cox multivariate analysis among 205 IDH mutant, 1p/19q co-deleted cases on which adjuvant treatment data were available; with mitotic index (A) and with WHO grade (B). CI-confidence interval.

| <b>A</b> | <b>Variable</b>                           | <b>p-value</b> | <b>Hazard Ratio</b> | <b>95% CI</b> |
|----------|-------------------------------------------|----------------|---------------------|---------------|
|          | <b>Mitotic index (high vs. low)</b>       | 0.3202         | 1.28                | 0.79-2.09     |
|          | <b>Age</b>                                | 0.7981         | 1.00                | 0.98-1.02     |
|          | <b>Adjuvant chemotherapy (yes vs. no)</b> | 0.430          | 0.84                | 0.55-1.29     |
|          | <b>Adjuvant radiation (yes vs. no)</b>    | 0.063          | 0.62                | 0.37-1.03     |
| <b>B</b> | <b>Variable</b>                           | <b>p-value</b> | <b>Hazard Ratio</b> | <b>95% CI</b> |
|          | <b>WHO grade (III vs. II)</b>             | 0.4969         | 1.17                | 0.74-1.86     |
|          | <b>Age</b>                                | 0.8703         | 1.00                | 0.98-1.02     |
|          | <b>Adjuvant chemotherapy (yes vs. no)</b> | 0.2988         | 0.80                | 0.52-1.22     |
|          | <b>Adjuvant radiation (yes vs. no)</b>    | 0.1527         | 0.67                | 0.39-1.16     |
